# Supplementary material for: Relationships between Intensity and Liking for Chemosensory Stimuli in Food Models: A Large-Scale Consumer Segmentation
Source: MDPI journal article supplement (doi:10.3390/foods11010005), 2021-12-21
Supplement: s1 [file s1]

Supplementary materials

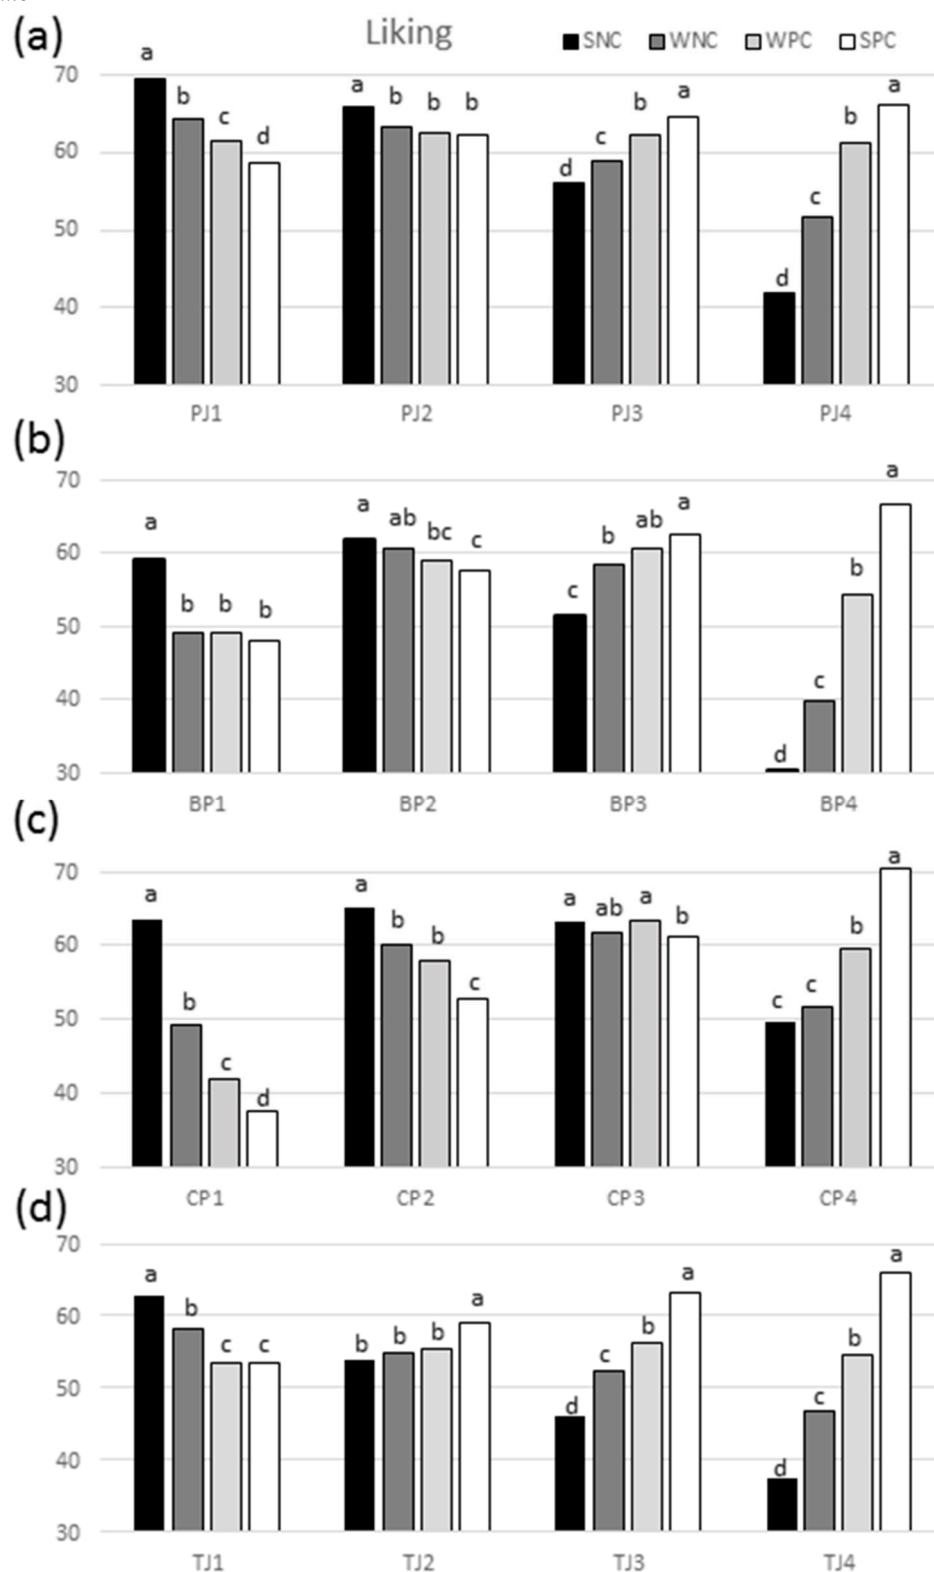

**Figure S1.** Differences between clusters (SNC = Strong Negative Correlation, WNC = Weak Negative Correlation, WPC = Weak Positive Correlation, and SPC = Strong Positive Correlation) in terms of liking among the four samples are reported for each food model: Pear Juice (a), Bean Purée (b), Chocolate Pudding (c), and Tomato Juice (d). Within each sample, different letters indicate a statistically significant difference ( $p < 0.05$ ) among clusters.

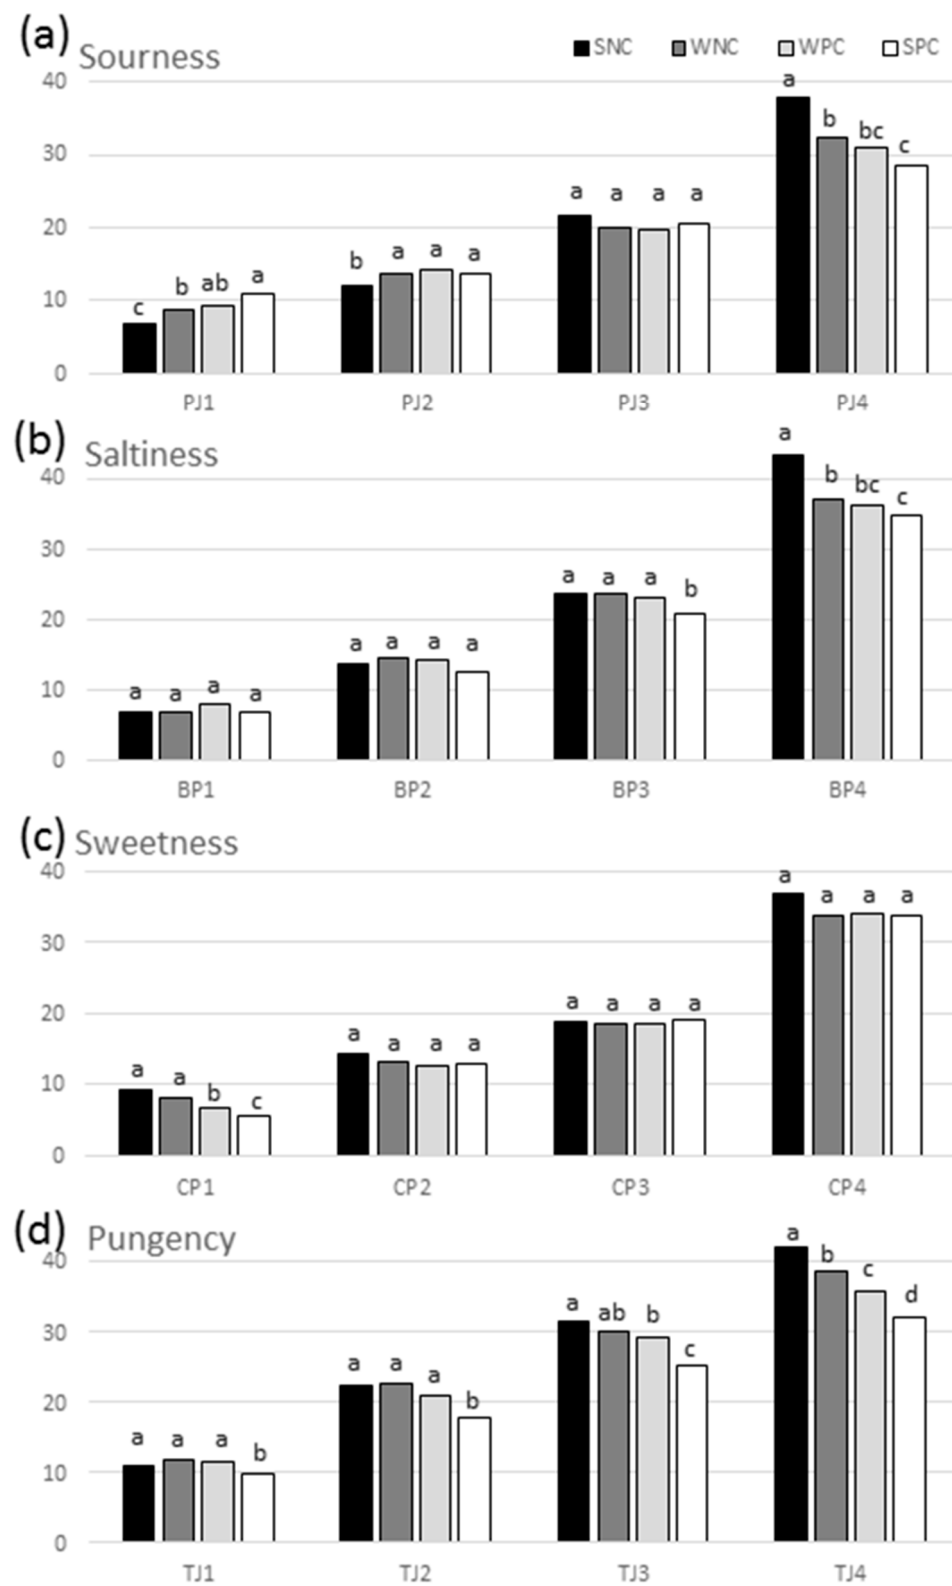

**Figure S2.** Differences between clusters (SNC = Strong Negative Correlation, WNC = Weak Negative Correlation, WPC = Weak Positive Correlation, and SPC = Strong Positive Correlation) in terms of perceived intensity of target sensation among the four samples are reported for each food model: Pear Juice (a), Bean Purée (b), Chocolate Pudding (c), and Tomato Juice (d). Within each sample, different letters indicate a statistically significant difference ( $p < 0.05$ ) among clusters.

**Table S1.** List of abbreviations in alphabetical order.

| Abbreviation | Description                                                         |
|--------------|---------------------------------------------------------------------|
| ANOVA        | ANalysis Of VAriance                                                |
| BMI          | Body Mass Index                                                     |
| BP           | Bean Purée                                                          |
| BP1- BP4     | Bean purée samples with increasing concentration of sodium chloride |
| CP           | Chocolate Pudding                                                   |
| CP1-CP4      | Chocolate pudding samples with increasing concentration of sucrose  |
| gLMS         | general Labeled Magnitude Scale                                     |
| IT           | Italian Taste                                                       |
| LAM          | Labelled Affective Magnitude                                        |
| MT           | medium tasters                                                      |
| NT           | non-tasters                                                         |
| PJ           | Pear Juice                                                          |
| PJ1-PJ4      | Pear juice samples with increasing concentration of citric acid     |
| PROP         | 6-n-propylthiouracil                                                |
| SD           | Standard Deviation                                                  |
| SNC          | Strong Negative Correlation                                         |
| SPC          | Strong Positive Correlation                                         |
| ST           | supertasters                                                        |
| TJ           | Tomato Juice                                                        |
| TJ1-TJ4      | Tomato juice samples with increasing concentration of capsaicin     |
| TS           | Target sensation                                                    |
| WNC          | Weak Negative Correlation                                           |
| WPC          | Weak Positive Correlation                                           |
